# Supplementary material for: Levosimendan can effectively reduce myocardial cell apoptosis caused by hypoxia through antioxidant activity
Source: Research Square preprint supplement (doi:10.21203/rs.3.rs-7676499/v1), 2026-01-20
Supplement: Supplementary file 1 [file 1683a02b06ef6376880bd423.pdf]

Supporting Information for

# **Levosimendan can effectively reduce myocardial cell apoptosis caused by hypoxia through antioxidant activity**

Siqi Zhao<sup>1</sup>, Hong Chang<sup>1</sup>, Qian Sun<sup>2</sup>, Rui Fei<sup>3</sup>, Lei Zhang<sup>1\*</sup>

<sup>1</sup>*Department of Cardiovascular Medicine, Xinmin Branch, The Third Bethune Hospital of Jilin University, Changchun Jilin 130031, P.R. China;*

<sup>2</sup> *College of Life Science, Changchun Normal University, Changchun Jilin 130032, P.R. China;*

<sup>3</sup>*Department of Vascular Surgery, The Third Bethune Hospital of Jilin University, Changchun Jilin 130031, P.R. China*

*\*Corresponding Author: Lei Zhang Email: Zhanglei99@jlu.edu.cn*

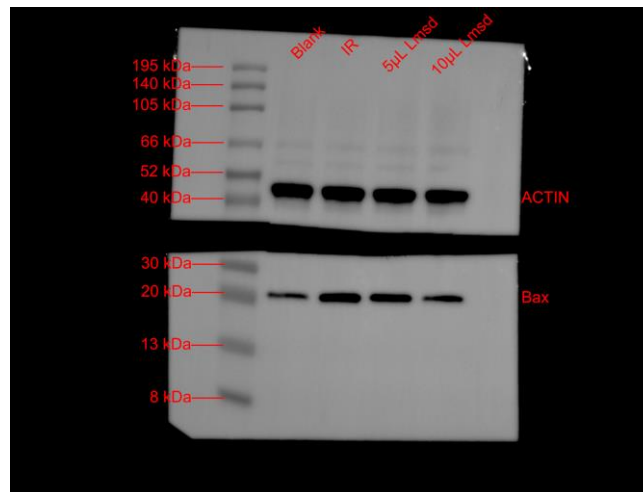

Figure S1. The raw data of Bax bands in WB experiment.

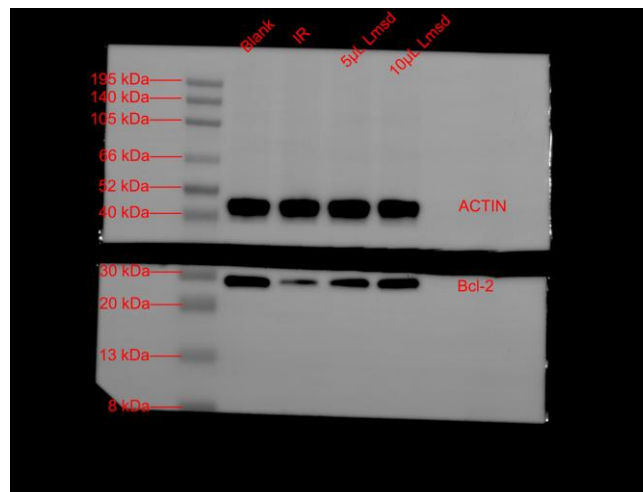

Figure S2. The raw data of Bcl-2 bands in WB experiment.

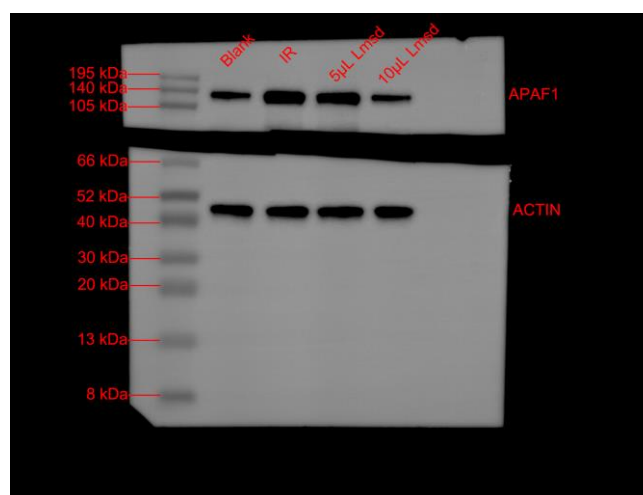

Figure S3. The raw data of APAF-1 bands in WB experiment.

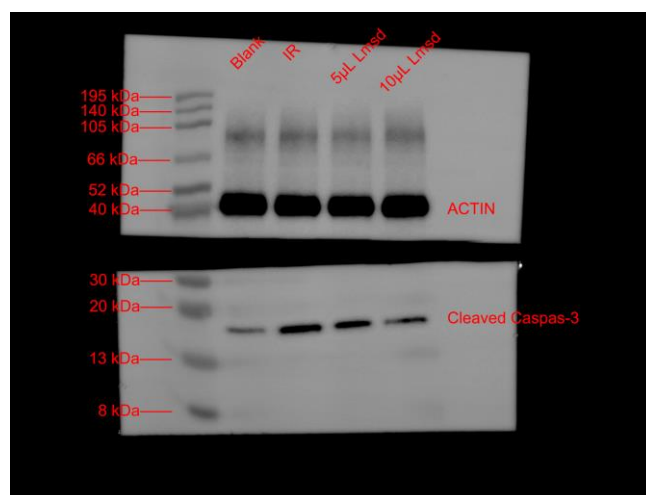

Figure S4. The raw data of Cleaved Caspas-3 bands in WB experiment.
